# Supplementary material for: Different Cross-Reactivities of IgM Responses in Dengue, Zika and Tick-Borne Encephalitis Virus Infections
Source: PubMed Central journal article supplement (PMC8066087; doi:10.3390/v13040596), 2021-03-31
Supplement: viruses-13-00596-s001.pdf [file viruses-13-00596-s001.pdf]

**Table S1.** Molecular diagnosis by PCR of TBE, Zika and dengue at the Center for Virology, Medical University of Vienna, Austria, 2016–2019.

|                | Number of Cases |            | % pos        |
|----------------|-----------------|------------|--------------|
|                | PCR pos         | Total      |              |
| <b>TBE</b>     |                 |            |              |
| 2016           | 0               | 89         |              |
| 2017           | 0               | 116        |              |
| 2018           | 1               | 154        |              |
| 2019           | 1               | 108        |              |
| <b>2016-19</b> | <b>2</b>        | <b>467</b> | <b>0.43</b>  |
| <b>Zika</b>    |                 |            |              |
| 2016           | 3               | 39         |              |
| 2017           | 1               | 7          |              |
| 2018           | 0               | 0          |              |
| 2019           | 1               | 1          |              |
| <b>2016-19</b> | <b>5</b>        | <b>47</b>  | <b>10.64</b> |
| <b>Dengue</b>  |                 |            |              |
| 2016           | 18              | 105        |              |
| 2017           | 18              | 70         |              |
| 2018           | 13              | 57         |              |
| 2019           | 32              | 116        |              |
| <b>2016-19</b> | <b>81</b>       | <b>348</b> | <b>23.28</b> |
